# Supplementary material for: Modeling of annexin A2—Membrane interactions by molecular dynamics simulations
Source: PLOS journal article supplement (doi:10.1371/journal.pone.0185440), 2017-09-22
Supplement: S1 (10.1371/journal.pone.0185440.s001) [file journal.pone.0185440.s001]

The initial and final configurations of AnxA2 in all 18 orientations are shown in S1 Fig.

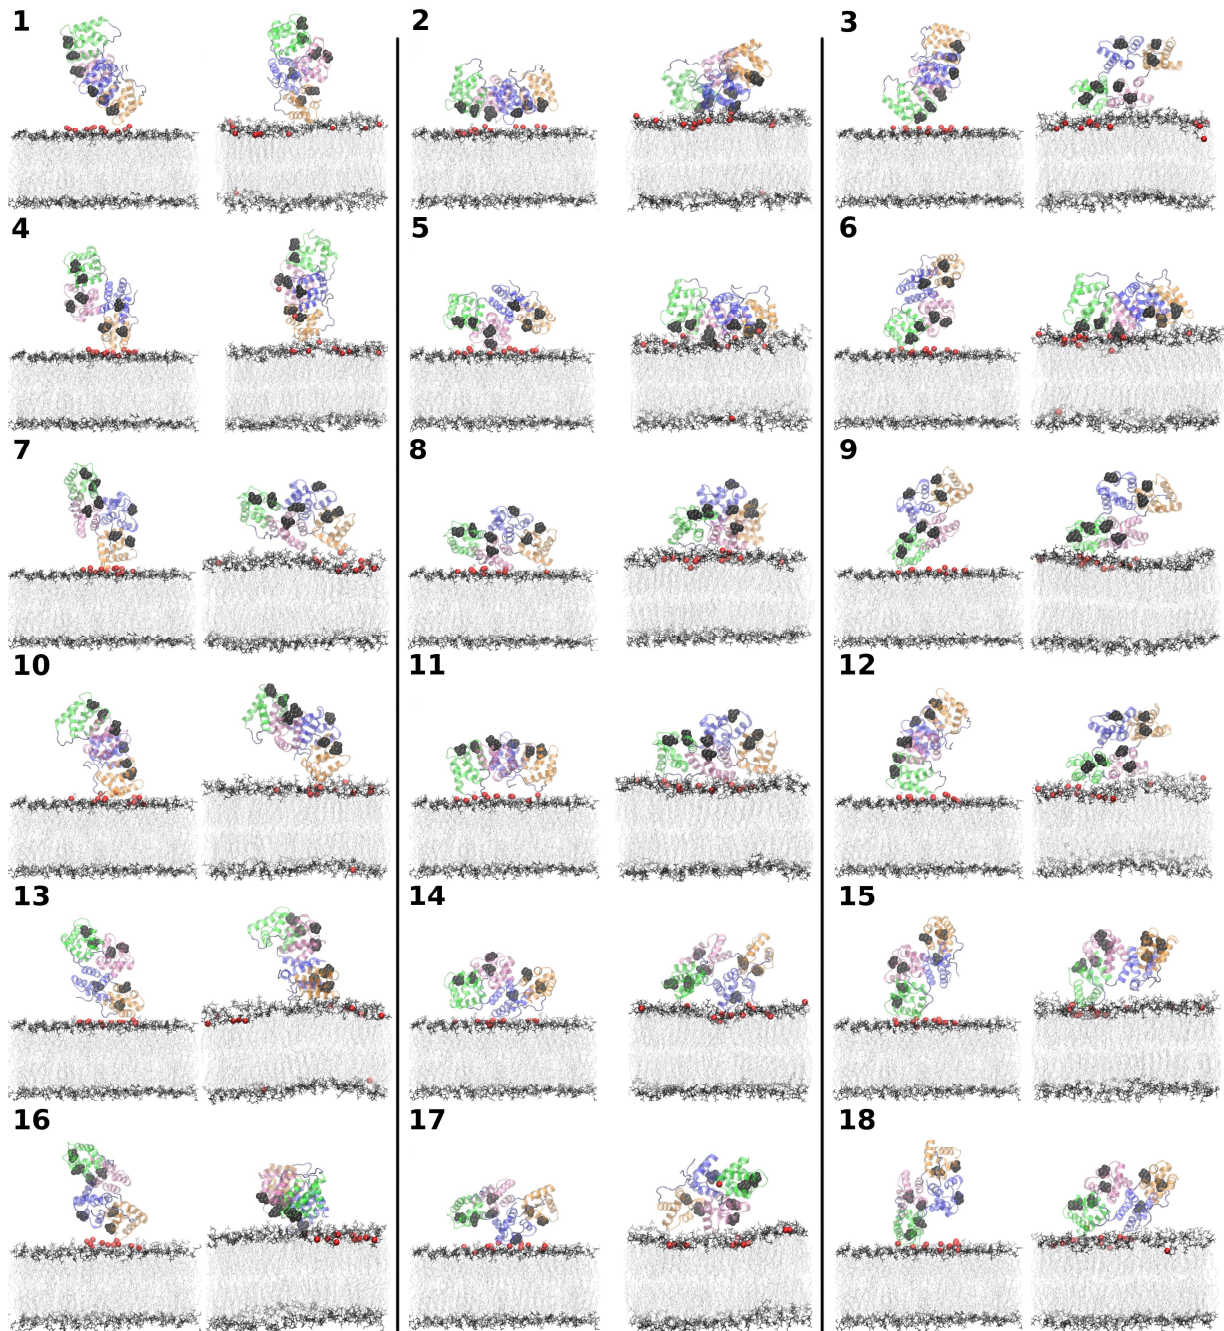

**S1 Fig. The initial and final configurations of 18 systems.** Each pair shows the initial and final configurations of AnxA2 in respective system. The four repeats of AnxA2 are shown in different colors: repeats 1 (Ala35 – Lys104), 2 (Ala107 – Lys176), 3 (Asp187 – Ile263) and 4 (Lys266 – Cys335). The experimentally found  $\text{Ca}^{2+}$  binding Asp or Glu residues are shown in black. The  $\text{Ca}^{2+}$  ions are shown as red spheres.
